# Supplementary material for: Assessment of COVID-19 pandemic responses in African countries: thematic synthesis of WHO intra-action review reports
Source: PubMed Central journal article supplement (PMC9062458; doi:10.1136/bmjopen-2021-056896), 2022-05-02
Supplement: bmjopen-2021-056896supp001.pdf [file bmjopen-2021-056896supp001.pdf]

**Table 1: Summary of challenges and best practices documented in 18 intra-action review reports available by March 2021 in Africa**

|   | <b>Domain</b>                               | <b>Challenges</b>                                                                                                                                                           | <b>Best Practices</b>                                                                                                                                                                                                        |
|---|---------------------------------------------|-----------------------------------------------------------------------------------------------------------------------------------------------------------------------------|------------------------------------------------------------------------------------------------------------------------------------------------------------------------------------------------------------------------------|
| 1 | Coordination, Planning, and Monitoring      | Gaps in the implementing preparedness and response plan to COVID-19: Botswana                                                                                               | Early assessment and strengthening of preparedness and response capacities in Botswana                                                                                                                                       |
|   |                                             | Testing of the preparedness plan at outbreak onset not done through drills or simulation exercises                                                                          | Clear leadership and strong political commitment in COVID-19 response with the creation of a high-Level committees on COVID-19 pandemic control: Botswana.                                                                   |
|   |                                             | Some provinces/States do not have fully operational IMTs and do not coordinate effectively with the districts/councils, impeding the pace of implementing key interventions | Early activation of the Incident Management System (IMT) and creation of an inter-sectoral committee (technical pillars)                                                                                                     |
|   |                                             | Forecasting did not address some important aspects of the response e.g. surge capacity, financial resources                                                                 | Evolving preparedness and response plans adapted to the ever-changing global and local context and WHO guidelines: Botswana                                                                                                  |
|   |                                             | Piece-meal release of guidelines which were disseminated in soft copy but not easily accessible to all                                                                      | Decision making at technical and policy level are in synchrony                                                                                                                                                               |
|   |                                             | Inadequate funds for COVID-19 preparedness measures following onset                                                                                                         | Regional and sub-regional collaboration via weekly meeting for cooperation and sharing of best practices                                                                                                                     |
| 2 | Risk Communication and Community Engagement | Diffusion of personal information on patients in the media and on social media platforms                                                                                    | Government embracing partnerships and support from bilateral and multilateral agencies, private sector, foundations, and friendly countries<br><br>Inclusion of COVID-19 Responses in Health Sector Strategic Plan 2020-2024 |
|   |                                             |                                                                                                                                                                             | Early intense sensitization campaign on COVID-19 by the Ministry of Health across wide range of media with the close collaboration of key stakeholders for maximum reach: Botswana                                           |

|    |                                                      |                                                                                                                                                                                                      |                                                                                                                                                                                                                                                                       |
|----|------------------------------------------------------|------------------------------------------------------------------------------------------------------------------------------------------------------------------------------------------------------|-----------------------------------------------------------------------------------------------------------------------------------------------------------------------------------------------------------------------------------------------------------------------|
|    |                                                      | Difficulty in striking the right balance between sharing accurate and reliable information and stressing on public health measures put in place without creating fear and panic among the population | All official diffusion of information from the Government emanated from the National Presidential Task Force (or Nat'l Communication Committee) on COVID-19 via the daily press conference, resulting in direct and harmonized dissemination of information: Botswana |
|    |                                                      |                                                                                                                                                                                                      | Diverse platforms for diffusion of communication such as the hotline, daily press conferences, facebook, websites and mobile application, for maximum reach and meeting the varied information seeking behaviours of the different segments of the population         |
|    |                                                      | Rapidly spreading rumours and 'fake news' which were easily accepted by the population: Botswana                                                                                                     | Fake news on social media was sanctionable to dissuade the spreading of misinformation                                                                                                                                                                                |
|    |                                                      | Limited financial resources delayed relaying communication through local radio stations                                                                                                              | Media programmes and IEC material produced in local languages and braille, especially in Zambia and South Africa.                                                                                                                                                     |
| 3. | Surveillance, Rapid Response, and Case Investigation | Delays in the contact tracing exercise due to the escalating number of positive cases as the outbreak evolves                                                                                        | Relatively efficient and prompt case investigation and scaled up contact tracing in Botswana,                                                                                                                                                                         |
|    |                                                      | Difficulty in locating contacts due to inaccurate addresses slowed down the contact tracing exercise                                                                                                 | Early attention to surveillance at points of entry with double temperature checks and specific investigation followed by community surveillance by health inspectors for 14 days                                                                                      |
|    |                                                      | Resistance to self-isolation for asymptomatic contacts                                                                                                                                               | Multiple surveillance systems were used: surveillance at borders, community surveillance, hospital and laboratory surveillance and the sentinel surveillance system for influenza-like illness (ILI) and Severe Acute Respiratory Infection Surveillance (SARI).      |
|    |                                                      | Difficulty in ascertaining that contacts are abiding by public health instructions                                                                                                                   | Establishment of modelling team/consortium generating predictions from the models guiding the scaling up of case management and testing capacities. Example is the South African COVID-19 Modelling Consortium. (Ethiopia was al                                      |

|   |                 |                                                                                                                                                                                                                                      |                                                                                                                                                                                                                          |
|---|-----------------|--------------------------------------------------------------------------------------------------------------------------------------------------------------------------------------------------------------------------------------|--------------------------------------------------------------------------------------------------------------------------------------------------------------------------------------------------------------------------|
|   |                 | Resistance to isolation/monitoring in treatment centre, especially for positive asymptomatic contacts                                                                                                                                | Daily, weekly reporting and provision of feedback enabled tracking of the trajectory of the epidemic (All countries)                                                                                                     |
|   |                 | Responding to multiple outbreak and humanitarian issues. For example, Dengue in Mauritius                                                                                                                                            | Deployment of field epidemiologists & surveillance officers (from government and WHO) who assisted with collation, analysis, reporting, contact tracing and investigation of new clusters                                |
|   |                 | High risk of concealment of symptoms among travelers or incoming passengers or potential cases within communities                                                                                                                    | Coordination with different stakeholders at the local level (e.g. NGOs, academia, private sector) brought onboard additional expertise that improved data analysis, case investigation and contact tracing. E.g Botswana |
|   |                 | Knowledge gaps particularly around the level of herd immunity, duration of immunity, correlates of protection delayed provision of guidance and the design of interventions                                                          | Use of digital contact tracing applications like COVID-Connect                                                                                                                                                           |
|   |                 | Lack of community support for contact tracing                                                                                                                                                                                        | Use of CHW as a backbone to contact tracing                                                                                                                                                                              |
|   |                 | Increased caseload and wide geographical spread constrained the available resources in a short time                                                                                                                                  | Repurposing existing staff for case investigation and contact tracing                                                                                                                                                    |
| 4 | Points of Entry | Lack of preparedness for unprecedented border closure and the need to rapidly scale up quarantine capacities and Infection Prevention and Control (IPC) measures to welcome the high volume of incoming citizens in the last flights | Early quarantine measures for incoming passengers with high-risk characteristics                                                                                                                                         |
|   |                 | Lack of ICT connectivity for remote PoE                                                                                                                                                                                              | Comprehensive screening of all travellers while still aboard conveyances                                                                                                                                                 |
|   |                 | Lack of isolation facilities in some PoE                                                                                                                                                                                             | Free compulsory quarantine for all returning citizens. All countries                                                                                                                                                     |
|   |                 | Inadequate supplies, equipment and other logistics at PoE e.g. PPEs, gloves, swabs, airtime, data bundles, tablets and transport                                                                                                     | Rapid closure of borders upon detection of the first few cases of COVID-19, all of which were imported cases. All countries                                                                                              |

|  |                                                                                                                                           |                                                                                                                                                                                                                                                                                                                                                                                                      |
|--|-------------------------------------------------------------------------------------------------------------------------------------------|------------------------------------------------------------------------------------------------------------------------------------------------------------------------------------------------------------------------------------------------------------------------------------------------------------------------------------------------------------------------------------------------------|
|  | Economic toll of closed borders due to heavy reliance on both tourism and import and export services and close links to Asia and Europe   | Prompt imposition of travel restrictions for high-risk countries                                                                                                                                                                                                                                                                                                                                     |
|  | Incidences of disturbance in quarantine centre from individuals contesting the restriction in spite of lengthy and repeated sensitisation | Amended testing strategy for quarantine from the only exit test to regular testing on Day 0, Day 7 and Day 14 for early detection and isolation of cases and reduced costs of quarantine                                                                                                                                                                                                             |
|  | Inadequate risk communication at PoEs                                                                                                     | Traing and Engagement of additional staff to address the shortage of personnel at the PoE. All countries                                                                                                                                                                                                                                                                                             |
|  | Lack of signage to guide travellers on processes                                                                                          | Availability of partner support (AFENET, WHO) towards monitoring of travellers on quarantine using mobile phone                                                                                                                                                                                                                                                                                      |
|  | Human resource deficiency                                                                                                                 | Timely provision of Information, Education and Communication (IEC) materials at PoE                                                                                                                                                                                                                                                                                                                  |
|  | Insufficient collaboration between private and public sector at entry point level                                                         | Availability of data collection tools at PoE                                                                                                                                                                                                                                                                                                                                                         |
|  | Lack of coordination and harmonization of data among different PoE (aerial, land and maritime)                                            | Capacity building on surveillance, IPC and data management to POE staff. Botswana                                                                                                                                                                                                                                                                                                                    |
|  | Poor knowledge of viral ecology with human and environment interface                                                                      | Leveraging on existing cross-border collaborations with neighbouring countries                                                                                                                                                                                                                                                                                                                       |
|  | Difficulties in implementation of legislation and lengthy processes in the review of the legislative framework                            | Availability of thermal scanners and hand-held infra-red thermometers at PoE                                                                                                                                                                                                                                                                                                                         |
|  |                                                                                                                                           | <p>Suspension of cruise ships and passenger ships e.g. Senegal</p> <p>PCR testing for in- and outbound travellers</p> <p>Setting up of sanitary protocols for incoming cattle and their breeders during Tabaski for early detection, as seen in Senegal</p> <p>Decentralisation of diagnostics to the field enhanced early detection of case (reagent and GeneXpert deployed) as seen in Senegal</p> |

|                                                    |                                                                                                                                                                      |                                                                                                                                                                            |                                                                                                                                                                                                                                              |
|----------------------------------------------------|----------------------------------------------------------------------------------------------------------------------------------------------------------------------|----------------------------------------------------------------------------------------------------------------------------------------------------------------------------|----------------------------------------------------------------------------------------------------------------------------------------------------------------------------------------------------------------------------------------------|
| 5                                                  | Infection and Prevention Control                                                                                                                                     | Initial challenges in implementing IPC measures in healthcare settings with limited availability of the PPE and health personnel poorly adopting the new sanitary measures | Immediate and stringent national lockdown following the detection of the first few cases to halt the spread of COVID-19 and allow for the detection of positive cases via contact tracing                                                    |
|                                                    |                                                                                                                                                                      | Inconsistent application of IPC measures leading to varying degrees of health care worker infection across countries                                                       | Strict IPC measures implemented for the safety of the health care workers such as provision of adequate PPE, isolation during their working shifts with provision of accommodation, quarantining and testing at the end of their work shifts |
|                                                    |                                                                                                                                                                      | IPC planning and preparation for the pandemic started late and delayed training and implementation                                                                         | Availability of national IPC training guideline and step-down of training supported by WHO. All countries                                                                                                                                    |
|                                                    |                                                                                                                                                                      | Initial poor management and irrational use of PPE leading to inadequacies in stock                                                                                         | The creation/amendment and implementation of legal frameworks to prevent the spreading of COVID-19 to reinforce guidelines for IPC measures                                                                                                  |
|                                                    |                                                                                                                                                                      | Poor coordination of trainings between MoH and partners resulting in duplication of efforts, insufficient district coverage and incomplete practical demonstrations        | Adoption of IPC measures across all sectors of the whole-of-government approach facilitated by the High-Level Committee on COVID-19 and different multisectoral initiative                                                                   |
|                                                    |                                                                                                                                                                      | Poor enforcement of public health measures by relevant authorities                                                                                                         | Development of tools for monitoring IPC in PoE and facilities                                                                                                                                                                                |
|                                                    |                                                                                                                                                                      | Low risk perception by the public on COVID-19 led to poor compliance to IPC measures                                                                                       | Working with local authorities and local leaderships in fostering compliance                                                                                                                                                                 |
|                                                    |                                                                                                                                                                      | Indiscriminate disposal of surgical masks in the community                                                                                                                 | Introduction of the Work Access Permit for workers on essentials services to facilitate the monitoring of the movement of citizens during lockdown                                                                                           |
|                                                    |                                                                                                                                                                      | Poor waste segregation and color coding in the health facilities                                                                                                           | Immediate and stringent national lockdown following the detection of the first few cases to halt the spread of COVID-19 and allow for the detection of positive cases via contact tracing                                                    |
| Inadequate water supply for IPC in some facilities | Strict IPC measures implemented for the safety of the health care workers such as provision of adequate PPE, isolation during their working shifts with provision of |                                                                                                                                                                            |                                                                                                                                                                                                                                              |

|   |                 |                                                                                                                                                                                 |                                                                                                                                                     |
|---|-----------------|---------------------------------------------------------------------------------------------------------------------------------------------------------------------------------|-----------------------------------------------------------------------------------------------------------------------------------------------------|
|   |                 |                                                                                                                                                                                 | accommodation, quarantining and testing at the end of their work shifts                                                                             |
| 6 | Case Management | Lack of specialized infectious disease hospitals with modern hi-tech facilities and bed capacity                                                                                | Guidelines and SOPs developed on case management available to guide uniform clinical management                                                     |
|   |                 | Countries with relatively high prevalence of NCDs have a relatively higher mortality associated with COVID-19                                                                   | Introduction of the community case management model reduced the pressure on the health system                                                       |
|   |                 | Sub-optimal data management including limited integration from different sources                                                                                                | Systematic isolation of all persons infected with SARS-CoV-2 in treatment centres, including asymptomatic patients with free treatment offered      |
|   |                 | Seeking palliatives for the family member of the COVID-19 victim was daunting financially for government to sustain                                                             | Knowledge exchange with international experts on latest updates about testing and treatment of COVID-19 and offering of the best treatment and care |
|   |                 | Lack of financial support given to vulnerable groups affected with COVID-19, this resulted into resistance to facility isolation or failure to observe public health guidelines | Clinicians Training Team on Case Management established to provide training support on guideline implementation and information dissemination       |
|   |                 | Limited supplies for case management                                                                                                                                            |                                                                                                                                                     |
|   |                 | Inadequate technical expertise to manage severe cases                                                                                                                           |                                                                                                                                                     |
|   |                 | Problem of health care worker infection impacting on commitment of health workers and stigmatisation                                                                            |                                                                                                                                                     |
|   |                 | Trainings initially funded by government did not incorporate private sector                                                                                                     |                                                                                                                                                     |
|   |                 | Rapidly changing case management protocol                                                                                                                                       |                                                                                                                                                     |
|   |                 | Delay in results also impacted negatively on case management                                                                                                                    |                                                                                                                                                     |

|                                                                                                                                                                       |                                                                                                                                                                                |                                                                                                                                                                                                     |                                                                                                                                                           |
|-----------------------------------------------------------------------------------------------------------------------------------------------------------------------|--------------------------------------------------------------------------------------------------------------------------------------------------------------------------------|-----------------------------------------------------------------------------------------------------------------------------------------------------------------------------------------------------|-----------------------------------------------------------------------------------------------------------------------------------------------------------|
| 7                                                                                                                                                                     | National Laboratory System                                                                                                                                                     | Inadequate coordination, prioritization, consultation and capacity for COVID-19 testing strategies                                                                                                  | Early development of the testing capacity for SARS-CoV-2 enabled the prompt detection of the imported cases                                               |
|                                                                                                                                                                       |                                                                                                                                                                                | Inadequate incentives provided for staff                                                                                                                                                            | Rapid roll-out of mobile testing improved access to testing and reducing the turnaround time                                                              |
|                                                                                                                                                                       |                                                                                                                                                                                | Missing variables on laboratory forms and some samples not accompanied by forms led to time lost sorting samples                                                                                    | Collaboration with the private laboratories significantly boosted the testing capacity across the country                                                 |
|                                                                                                                                                                       |                                                                                                                                                                                | Delays in processing samples from BIDs and in-patients. E.g Zambia                                                                                                                                  | All laboratories were subjected to quality assurance tests before being accredited as SARS-CoV-2 testing laboratories                                     |
|                                                                                                                                                                       |                                                                                                                                                                                | Lack of in-country capacity (engineers) to service and maintain equipment. E.g Zambia                                                                                                               | Existence of pandemic influenza surveillance program (PIP), national influenza centres (NIC) and viral haemorrhagic fever (VHF) laboratories              |
|                                                                                                                                                                       |                                                                                                                                                                                | Inadequate laboratory reagents and supplies that could sustain the demand due to limited market availability of supplies                                                                            | Availability of competent personnel, skills and supplies for the start-up process                                                                         |
|                                                                                                                                                                       |                                                                                                                                                                                | Management of laboratory resources without compromising the quality standards for testing for other pathologies and biological/clinical tests while facing an increased demand for COVID-19 testing | Joint partnership between government and development partners in procurement of supplies                                                                  |
|                                                                                                                                                                       |                                                                                                                                                                                | Cases of infection of technicians and contamination as well as burn-out of lab personnel as seen in Zambia                                                                                          | Epidemiologic numbers used within the laboratory network are shared which helped a quick return of results (and data harmonization)                       |
|                                                                                                                                                                       |                                                                                                                                                                                | Shortage of consumables and reagents for testing at the beginning of the outbreak with the rapid escalation of positive cases and increased demand for testing. E.g Zambia                          | Central reporting, data management through the confidentiality and data declaration as well as mandatory sharing of data for surveillance and bio-banking |
| Difficulty in purchasing consumables and reagents, due to high global demands and competition among countries and relatively small orders compared to other countries | Expanding the testing capacities of the central health laboratory via recruitment of additional technicians, 24/7 operating and acquisition of additional laboratory equipment |                                                                                                                                                                                                     |                                                                                                                                                           |

|   |                                                                                        |                                                                                                                                                                                                                                                                                                                                                                                                                                                                                                                                              |                                                                                                                                                                                                                                                                                                                                                                                                                                                                                                                                |
|---|----------------------------------------------------------------------------------------|----------------------------------------------------------------------------------------------------------------------------------------------------------------------------------------------------------------------------------------------------------------------------------------------------------------------------------------------------------------------------------------------------------------------------------------------------------------------------------------------------------------------------------------------|--------------------------------------------------------------------------------------------------------------------------------------------------------------------------------------------------------------------------------------------------------------------------------------------------------------------------------------------------------------------------------------------------------------------------------------------------------------------------------------------------------------------------------|
|   |                                                                                        | Lack of cooler boxes for the RRTs due to stacks of unprocessed samples                                                                                                                                                                                                                                                                                                                                                                                                                                                                       | Introduction of the Laboratory information management system (LIMS) for COVID-19 during the outbreak to improve the management, access and storage of key data and facilitate quick dissemination of results                                                                                                                                                                                                                                                                                                                   |
|   |                                                                                        | The bulk of laboratory testing has come from the private sector, this presented huge coordination challenges in South Africa                                                                                                                                                                                                                                                                                                                                                                                                                 | Mitigation of biosafety risks with intensified safety measures such as increase in number of biosafety cabinets, staff training and wearing personal protective equipment (PPE)                                                                                                                                                                                                                                                                                                                                                |
| 8 | Operational support and logistics in the management of supply chains and the workforce | Shortages of PPEs for health care workers and frontline workers<br>Product misuse and wastages<br>Problems with quantification of stocks<br>Lack of locally manufactured products hence the heavy reliance on importation of medical products<br>Lack of emergency procurement guideline<br>Delays in delivery of products                                                                                                                                                                                                                   | Existing emergency preparedness and response plan for Ebola in countries like Malawi, Rwanda, and South Sudan<br>Engaging private sectors and NGOs for logistics support, as seen in Rwanda<br>Integrated supply chain system<br>Emergency procurement for timely delivery of essential medical materials<br>Already existing operational support and logistics in the management of supply chains and the workforce. In South Africa for example leveraged on stock visibility systems to facilitate tracking of stock levels |
| 9 | Maintaining essential health services during COVID-19 outbreak                         | Absence of Essential Health Services pillar on the IMS structure (initially)<br>Absence of a plan for continuity of essential health services during outbreaks/public health events<br>In the early stages of the outbreak, there was a reduction in the number of people accessing EHS due to fears of getting infected<br>Inadequate focus and evaluation of essential health services provision during the COVID-19 response<br>Consequent backlog in elective care and increased attendance (post lockdown) since resumption of services | Continued active surveillance for other reportable diseases using IDSR<br>HIV/ART care and Maternal and Child health services continued, including implementation of child health week activities, during the outbreak<br>Availability of guidelines for the provision of essential health services<br>Monitoring and evaluation continued sharing trends on various indicators<br>Consistent release of funds for essential services by government and partners                                                               |



|  |                                                                                                                                                                                                           |                                                                                                                                                              |
|--|-----------------------------------------------------------------------------------------------------------------------------------------------------------------------------------------------------------|--------------------------------------------------------------------------------------------------------------------------------------------------------------|
|  | Difficulties in organising treatment abroad for patients needing specialised surgery                                                                                                                      | Implementation of IPC measures to protect inpatients and outpatients while maintaining essential services                                                    |
|  | Difficulties in detecting the scale of the dengue outbreak due to decrease in healthcare facilities' functionality                                                                                        | Maintaining and scaling-up of the yearly anti-influenza vaccination campaign (in Mauritius)                                                                  |
|  | Risk of increase incidence of Hepatitis C and HIV due to the observed increase in risky behaviours among people who inject drugs caused by the disruption of needle and syringe programmes (in Mauritius) | Maintained essential health services and the introduction of teleconsultation in the private health sector                                                   |
|  | Interrupted immunisation vaccination campaigns for infants, children and adolescents presented a risk of reversing the past achievements of other communicable diseases (in Mauritius)                    | Stock evaluation and ensuring the availability of essential medications, equipment and supplies for diseases and life course conditions other than COVID-19. |
|  | Disrupted public health services in Rodrigues despite no registered cases of COVID-19 on the island (in Mauritius)                                                                                        |                                                                                                                                                              |
